# Supplementary material for: Ferro- and antiferromagnetic interactions in face-sharing trioctahedral NiIIMnIINiIIand NiIIFeIIINiIIcomplexes with the same 1–5/2–1 spin system
Source: Royal Society of Chemistry journal article supplement (doi:10.1039/b517503h), 2006-01-01
Supplement: b517503h.pdf [file b517503h.pdf]

Electronic Supplementary Information (ESI)

Synthesis and characterization of **1** and **2**.

[Mn<sup>II</sup>(Ni<sup>II</sup>L)<sub>2</sub>]**·**2CH<sub>3</sub>OH (**1**): Mn<sup>II</sup>Cl<sub>2</sub>·4H<sub>2</sub>O (0.02 g, 0.1 mmol) in methanol (30 cm<sup>3</sup>) and Et<sub>3</sub>N (0.02 g, 0.2 mmol) in methanol (20 cm<sup>3</sup>) were added to a methanol solution (50 cm<sup>3</sup>) of [Ni<sup>II</sup>(HL)] (0.097 g, 0.2 mmol). The mixture was left at room temperature for three days to form orange crystals. Yield: 0.052 g (48%). Anal.: calcd for C<sub>54</sub>H<sub>56</sub>N<sub>6</sub>Ni<sub>2</sub>MnO<sub>8</sub> = [Mn<sup>II</sup>(Ni<sup>II</sup>L)<sub>2</sub>]**·**2CH<sub>3</sub>OH: C 59.54, H 5.18, N 7.71, Ni 10.78, Mn 5.04%; found: C 59.37, H 4.30, N 7.74, Ni 10.78, Mn 5.09%. IR (KBr):  $\nu$ (C=N) 1628 cm<sup>-1</sup>.  $\Lambda_M$ : 2.01 S mol<sup>-1</sup> cm<sup>2</sup> in DMF (ca. 0.4 mM). UV-Vis (DMSO): 555 (log  $\epsilon/M^{-1}$  cm<sup>-1</sup>: 59) and 368 nm (4.41).

[Fe<sup>III</sup>(Ni<sup>II</sup>L)<sub>2</sub>](NO<sub>3</sub>)**·**C<sub>2</sub>H<sub>5</sub>OH (**2**): Fe<sup>III</sup>(NO<sub>3</sub>)<sub>3</sub>·9H<sub>2</sub>O (0.04 g, 0.1 mmol) in ethanol (10 cm<sup>3</sup>) and Et<sub>3</sub>N (0.02 g, 0.02 mmol) in ethanol (10 cm<sup>3</sup>) were added to an ethanol solution (40 cm<sup>3</sup>) of [Ni<sup>II</sup>(HL)] (0.097 g, 0.2 mmol). The mixture was left in a refrigerator for two weeks to form dark purple crystals. Yield: 0.043 g (38%). Anal.: calcd for C<sub>54</sub>H<sub>54</sub>FeN<sub>7</sub>Ni<sub>2</sub>O<sub>10</sub> = [Fe<sup>III</sup>(Ni<sup>II</sup>L)<sub>2</sub>](NO<sub>3</sub>)**·**C<sub>2</sub>H<sub>5</sub>OH: C 57.18, H 4.80, N 8.64, Ni 10.35%; found: C 57.04, H 3.90, N 8.73, Ni 10.14%. IR (KBr):  $\nu$ (C=N) 1631;  $\nu$ (NO<sub>2</sub>) 1278 cm<sup>-1</sup>.  $\Lambda_M$ : 55 S mol<sup>-1</sup> cm<sup>2</sup> in DMF (ca. 0.4 mM). UV-Vis (DMSO): 514 nm (log  $\epsilon/M^{-1}$  cm<sup>-1</sup>: 3.64) and 344 nm (4.46).

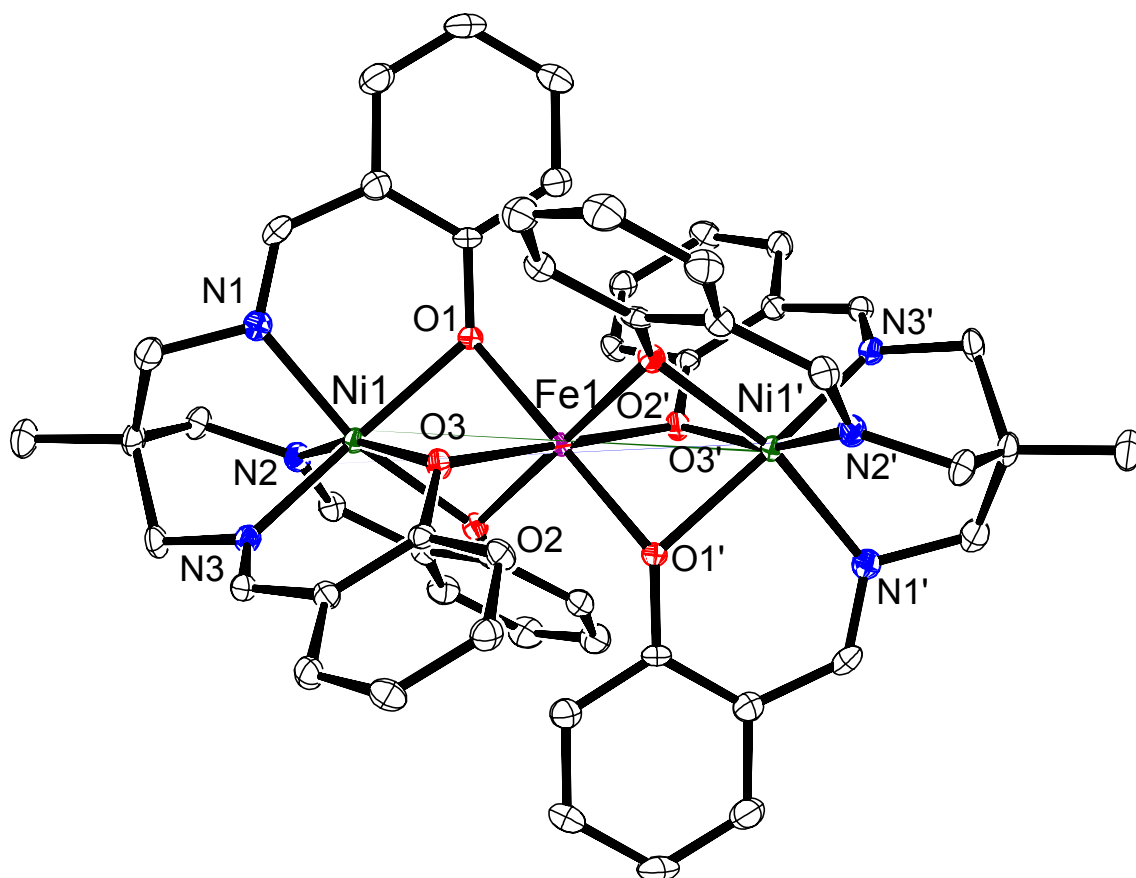

**Fig. S1.** X-ray molecular structure of 2.

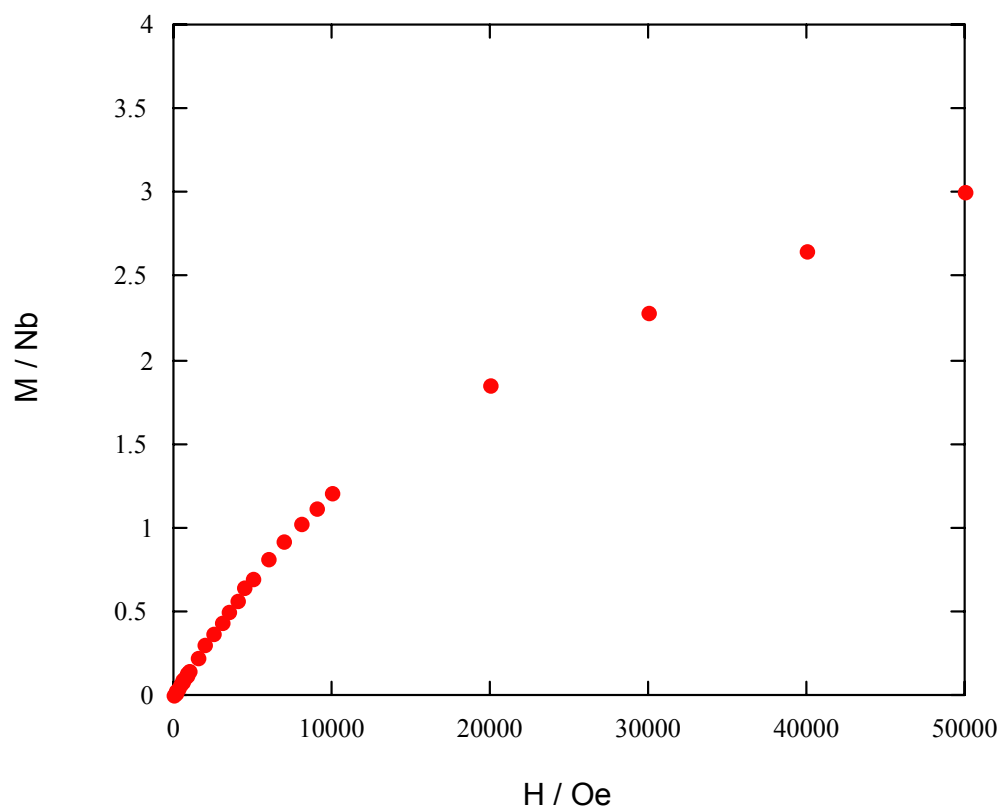

**Fig. S2.** Field dependence of magnetization at 1.9 K for **2**.
